# Supplementary material for: Cytomegalovirus Disease as a Risk Factor for Invasive Fungal Infections in Liver Transplant Recipients under Targeted Antiviral and Antimycotic Prophylaxis
Source: MDPI journal article supplement (doi:10.3390/jcm12165198), 2023-08-09
Supplement: s1 [file s1]

# **CMV Disease as Risk Factor for Invasive Fungal Infections in Liver Transplant Recipients under Targeted Antiviral and Antimycotic Prophylaxis**

## **Supplementary material**

### **Contents:**

**Table S1.** STROBE Statement - Checklist of items that should be included in reports of cohort studies

**Table S2.** Procedural data on transplantation, organ donation and preservation (n = 214).

**Table S3.** Postoperative complications and manifestation of CMV infection related to serostatus (n = 214).

**Table S4.** Postoperative complications and manifestation of CMV infection related to virus load (IU/ml; n = 50).

**Table S5.** Postoperative complications, one-year outcome and indirect effects of CMV infection (n=214).

**Table S6.** One-year outcome and indirect effects of CMV infection related to serostatus (n=214).

**Table S7.** One-year outcome and indirect effects of CMV infection related to virus load (IU/ml; n=50).

**Table S1.** STROBE Statement - Checklist of items that should be included in reports of cohort studies.

| No.                       | Item                         | Recommendation                                                                                                                                                                                    | Page |
|---------------------------|------------------------------|---------------------------------------------------------------------------------------------------------------------------------------------------------------------------------------------------|------|
| <b>Title and abstract</b> |                              |                                                                                                                                                                                                   |      |
| 1                         |                              | (a) Indicate the study's design with a commonly used term in the title or the abstract                                                                                                            | 1    |
|                           |                              | (b) Provide in the abstract an informative and balanced summary of what was done and what was found                                                                                               | 1    |
| <b>Introduction</b>       |                              |                                                                                                                                                                                                   |      |
| 2                         | Background/rationale         | Explain the scientific background and rationale for the investigation being reported                                                                                                              | 1-2  |
| 3                         | Objectives                   | State specific objectives, including any prespecified hypotheses                                                                                                                                  | 2    |
| <b>Methods</b>            |                              |                                                                                                                                                                                                   |      |
| 4                         | Study design                 | Present key elements of study design early in the paper                                                                                                                                           | 2-5  |
| 5                         | Setting                      | Describe the setting, locations, and relevant dates, including periods of recruitment, exposure, follow-up, and data collection                                                                   | 2-5  |
| 6                         |                              | (a) Give the eligibility criteria, and the sources and methods of selection of participants. Describe methods of follow-up                                                                        | 2-5  |
|                           | Participants                 | (b) For matched studies, give matching criteria and number of exposed and unexposed                                                                                                               | 2-5  |
| 7                         | Variables                    | Clearly define all outcomes, exposures, predictors, potential confounders, and effect modifiers. Give diagnostic criteria, if applicable                                                          | 2-5  |
| 8*                        | Data sources/<br>measurement | For each variable of interest, give sources of data and details of methods of assessment (measurement). Describe comparability of assessment methods if there is more than one group              | 2-5  |
| 9                         | Bias                         | Describe any efforts to address potential sources of bias                                                                                                                                         | 2-5  |
| 10                        | Study size                   | Explain how the study size was arrived at                                                                                                                                                         | -    |
| 11                        | Quantitative<br>variables    | Explain how quantitative variables were handled in the analyses. If applicable, describe which groupings were chosen and why                                                                      | -    |
| 12                        |                              | (a) Describe all statistical methods, including those used to control for confounding                                                                                                             | 5    |
|                           |                              | (b) Describe any methods used to examine subgroups and interactions                                                                                                                               | 5    |
|                           |                              | (c) Explain how missing data were addressed                                                                                                                                                       | -    |
|                           |                              | (d) If applicable, explain how loss to follow-up was addressed                                                                                                                                    | -    |
|                           | Statistical methods          | (e) Describe any sensitivity analyses                                                                                                                                                             | -    |
| <b>Results</b>            |                              |                                                                                                                                                                                                   |      |
| 13*                       |                              | (a) Report numbers of individuals at each stage of study—eg numbers potentially eligible, examined for eligibility, confirmed eligible, included in the study, completing follow-up, and analysed | 5    |
|                           |                              | (b) Give reasons for non-participation at each stage                                                                                                                                              | 5    |
|                           | Participants                 | (c) Consider use of a flow diagram                                                                                                                                                                | 7    |

|                          |                  |                                                                                                                                                                                                              |      |
|--------------------------|------------------|--------------------------------------------------------------------------------------------------------------------------------------------------------------------------------------------------------------|------|
| 14*                      |                  | (a) Give characteristics of study participants (eg demographic, clinical, social) and information on exposures and potential confounders                                                                     | 5-9  |
|                          |                  | (b) Indicate number of participants with missing data for each variable of interest                                                                                                                          | -    |
|                          | Descriptive data | (c) Summarise follow-up time (eg, average and total amount)                                                                                                                                                  | 5-10 |
| 15*                      | Outcome data     | Report numbers of outcome events or summary measures over time                                                                                                                                               | 5-10 |
| 16                       |                  | (a) Give unadjusted estimates and, if applicable, confounder-adjusted estimates and their precision (eg, 95% confidence interval). Make clear which confounders were adjusted for and why they were included | 5-10 |
|                          |                  | (b) Report category boundaries when continuous variables were categorized                                                                                                                                    | 5-10 |
|                          | Main results     | (c) If relevant, consider translating estimates of relative risk into absolute risk for a meaningful time period                                                                                             |      |
| 17                       | Other analyses   | Report other analyses done—eg analyses of subgroups and interactions, and sensitivity analyses                                                                                                               | 5-10 |
| <b>Discussion</b>        |                  |                                                                                                                                                                                                              |      |
| 18                       | Key results      | Summarise key results with reference to study objectives                                                                                                                                                     | 11   |
| 19                       | Limitations      | Discuss limitations of the study, taking into account sources of potential bias or imprecision. Discuss both direction and magnitude of any potential bias                                                   | 13   |
| 20                       | Interpretation   | Give a cautious overall interpretation of results considering objectives, limitations, multiplicity of analyses, results from similar studies, and other relevant evidence                                   | 13   |
| 21                       | Generalisability | Discuss the generalisability (external validity) of the study results                                                                                                                                        | 13   |
| <b>Other information</b> |                  |                                                                                                                                                                                                              |      |
| 22                       | Funding          | Give the source of funding and the role of the funders for the present study and, if applicable, for the original study on which the present article is based                                                | 13   |

\*Give information separately for exposed and unexposed groups.

**Table S2.** Procedural data on transplantation, organ donation and preservation (n = 214).

|                                                 | All patients<br>(n = 214) | No CMV<br>infection<br>(n = 164) | CMV infection<br>(n = 50) | P-value | Missing<br>(n/Total) |
|-------------------------------------------------|---------------------------|----------------------------------|---------------------------|---------|----------------------|
| <b>Operative characteristics</b>                |                           |                                  |                           |         |                      |
| Operation duration (minutes)                    | 355 (173-783)             | 353 (173-783)                    | 362 (188-614)             | 0.760   | 0/214                |
| Cold ischemia time (minutes)                    | 435 (125-1199)            | 433 (130-1061)                   | 471 (125-1199)            | 0.181   | 0/214                |
| Intraopertative blood transfusion (ml)          | 2412 (0-32740)            | 2257 (0-32740)                   | 3800 (0-11680)            | 0.011   | 0/214                |
| Type of graft                                   |                           |                                  |                           |         | 0/214                |
| Whole liver                                     | 208 (97.2)                | 160 (97.6)                       | 48 (96.0)                 | 0.626   |                      |
| Split liver                                     | 6 (2.8)                   | 4 (2.4)                          | 2 (4.0)                   |         |                      |
| Type of biliary anastomosis                     |                           |                                  |                           |         | 0/214                |
| Duct-to-duct                                    | 199 (93.0)                | 153 (93.3)                       | 46 (92.2)                 | 0.755   |                      |
| Roux-y-choledochojejunostomy                    | 15 (7.0)                  | 11 (6.7)                         | 4 (8.0)                   |         |                      |
| Type of venous anstomosis                       |                           |                                  |                           |         | 0/214                |
| Retrocaval resection                            | 205 (97.2)                | 157 (96.9)                       | 48 (98.0)                 | 1.000   |                      |
| Piggyback                                       | 6 (2.8)                   | 5 (3.1)                          | 1 (2.0)                   |         |                      |
| <b>Donation and preservation characterstics</b> |                           |                                  |                           |         |                      |
| Type of donation                                |                           |                                  |                           |         | 0/214                |
| Standard criteria donation                      | 46 (21.5)                 | 35 (21.3)                        | 11 (22.0)                 | 1.000   |                      |
| Extended criteria donation                      | 168 (78.5)                | 129 (78.7)                       | 39 (78.0)                 |         |                      |
| Type of donor death                             |                           |                                  |                           |         | 0/214                |
| DBD                                             | 196 (91.6)                | 149 (90.9)                       | 47 (94.0)                 | 0.575   |                      |
| DCD                                             | 18 (8.4)                  | 15 (9.1)                         | 3 (6.0)                   |         |                      |
| Preservation                                    |                           |                                  |                           |         | 0/214                |
| Static cold storage                             | 144 (67.3)                | 106 (64.6)                       | 38 (76.0)                 | 0.169   |                      |
| Normothermic machine perfusion                  | 70 (32.7)                 | 58 (35.4)                        | 12 (24.0)                 |         |                      |

Intraoperative blood transfusion includes packed red blood cells and autotransfusion of intraoperatively salvaged blood. Abbreviations: SAPS III: simplified acute physiology score III; MELD: model of end stage liver disease; DBD: donation after brain death; DCD: donation after circulatory determination of death.

**Table S3.** Postoperative complications and manifestation of CMV infection related to serostatus (n = 214).

| Characteristics             | All<br>(n = 214)      | D+/R-<br>(n = 59)          | R+<br>(n = 103)      | D-/R-<br>(n = 52) | P-value | Missing<br>(n/Total) |
|-----------------------------|-----------------------|----------------------------|----------------------|-------------------|---------|----------------------|
| Length of ICU stay (days)   | 5 (1-117)             | 5 (1-111)                  | 5 (3-40)             | 5 (2-117)         | 0.749   | 1/214                |
| Acute kidney injury         | 94 (43.9)             | 26 (44.1)                  | 46 (44.7)            | 19 (36.5)         | 0.400   | 0/214                |
| Primary non-function        | 2 (1.1)               | 0 (0)                      | 2 (1.9)              | 0 (0)             | 0.498   | 0/214                |
| Early allograft dysfunction | 56 (30.9)             | 13 (22.0)                  | 29 (28.2)            | 14 (26.9)         | 0.742   | 0/214                |
| Reoperation                 | 81 ( )                | 19 (32.2)                  | 41 (39.8)            | 21 (40.4)         | 0.592   | 0/214                |
| Bile leak                   | 20 (10.8)             | 4 (6.8)                    | 8 (7.8)              | 8 (15.4)          | 0.247   | 0/214                |
| Invasive fungal infection   | 26 (12.1)             | 8 (13.6)                   | 11 (10.7)            | 7 (13.5)          | 0.860   | 0/214                |
| Candidiasis                 | 19 (8.9)              | 5 (8.5)                    | 9 (8.7)              | 5 (9.6)           | 0.579   |                      |
| Aspergillosis               | 5 (2.3)               | 1 (1.7)                    | 2 (1.9)              | 2 (3.8)           |         |                      |
| Other                       | 2 (0.9)               | 2 (3.4)                    | 0 (0)                | 0 (0)             |         |                      |
| CMV infection               | 50 (23.4)             | 5 (8.5)                    | 43 (41.7)            | 2 (3.8)           | <0.001  | 0/214                |
| Time to onset (days)        | 23 (2-85)             | 50 (4-79)                  | 21 (2-85)            | 29 (10-48)        | 0.229   | 0/50                 |
| Virus load                  | 552 (146-1,057,871)   | 1,032 (149-1,057,871)      | 518 (146-100,080)    | 3,300 (591-6,010) | 0.512   | 0/50                 |
| CMV disease                 | 13 (6.1%)             | 2 (3.4)                    | 10 (9.7)             | 1 (1.9)           | 0.127   | 0/214                |
| Viral syndrome              | 7 (3.3)               | 1 (1.7)                    | 6 (5.8)              | 0 (0)             | 0.706   | 0/13                 |
| Tissue invasive             | 6 (2.8)               | 1 (1.7)                    | 4 (3.9)              | 1 (1.9)           |         |                      |
| Virus load                  | 6,010 (211-1,057,871) | 540,511 (23,150-1,057,871) | 1,9445 (211-100,080) | 6,010             | 0.343   | 0/13                 |

Abbreviations: CMV: cytomegalovirus; ICU: intensive care unit; D+/R-: donor seropositive/recipient seronegative; R+: recipient seropositive; D-/R-: donor seronegative/recipient seronegative.

**Table S4.** Postoperative complications and manifestation of CMV infection related to virus load (IU/ml;  $n = 50$ ).

| Characteristics               | All<br>( <i>n</i> = 50) | >125-500<br>( <i>n</i> =24) | 501-1000<br>( <i>n</i> = 7) | >1000<br>( <i>n</i> = 19) | P-value | Missing<br>( <i>n</i> /Total) |
|-------------------------------|-------------------------|-----------------------------|-----------------------------|---------------------------|---------|-------------------------------|
| CMV disease                   | 13 (6.1%)               | 5 (38.5)                    | 0 (0)                       | 8 (61.5)                  | 0.059   | 0/50                          |
| Viral syndrome                | 7 (53.8)                | 3 (60.0)                    | 0 (0)                       | 4 (50.0)                  | 1.000   | 0/13                          |
| Tissue invasive               | 6 (46.2)                | 2 (40.0)                    | 0 (0)                       | 4 (50.0)                  |         |                               |
| Postoperative characteristics |                         |                             |                             |                           |         |                               |
| Time to onset (days)          | 23 (2-85)               | 20 (2-79)                   | 27 (5-52)                   | 24 (3-85)                 | 0.606   | 0/50                          |
| Length of ICU stay (days)     | 5.5 (3-40)              | 6 (3-30)                    | 5.5 (3-15)                  | 5 (3-40)                  | 0.863   | 0/50                          |
| Primary non-function          | 1 (2.0)                 | 1 (4.2)                     | 0 (0)                       | 0 (0)                     | 1.000   | 0/50                          |
| Early allograft dysfunction   | 18 (36.0)               | 8 (33.3)                    | 2 (28.6)                    | 8 (42.1)                  | 0.733   | 0/50                          |
| Reoperation                   | 22 (44.0)               | 14 (58.3)                   | 3 (42.9)                    | 5 (26.3)                  | 0.068   | 0/50                          |
| Bile leak                     | 10 (20.0)               | 6 (25.0)                    | 2 (28.6)                    | 2 (10.5)                  | 0.503   | 0/50                          |
| Acute kidney injury           | 22 (44.0)               | 13 (54.2)                   | 2 (28.6)                    | 7 (36.8)                  | 0.238   | 0/50                          |
| Invasive fungal infection     | 8 (16.0)                | 4 (16.7)                    | 1 (14.3)                    | 3 (15.8)                  | 1.000   | 0/50                          |
| Candidiasis                   | 6 (12.0))               | 2 (8.3)                     | 1 (14.3)                    | 3 (15.8)                  | 0.742   | 0/50                          |
| Aspergillosis                 | 2 (4.0)                 | 2 (8.3)                     | 0 (0)                       | 0 (0)                     |         |                               |
| Other                         | 0 (0)                   | 0 (0)                       | 0 (0)                       | 0 (0)                     |         |                               |

Abbreviations: CMV: cytomegalovirus; ICU: intensive care unit.

**Table S5.** Postoperative complications, one-year outcome and indirect effects of CMV infection (n=214).

| Characteristics                  | All patients<br>(n = 214) | No Infection<br>(n = 164) | Infection<br>(n = 50) | P-value | Missing<br>(n/Total) |
|----------------------------------|---------------------------|---------------------------|-----------------------|---------|----------------------|
| Primary non-function             | 2 (1.1)                   | 1 (0.6)                   | 1 (2.0)               | 0.414   | 0/214                |
| Early allograft dysfunction      | 56 (30.9)                 | 38 (23.2)                 | 18 (36.0)             | 0.097   | 0/214                |
| Reoperation                      | 81 (37.9)                 | 59 (36.0)                 | 22 (44.0)             | 0.322   | 0/214                |
| Bile leak                        | 20(10.8)                  | 10 (6.1)                  | 10 (20.0)             | 0.009   | 0/214                |
| Acute kidney injury              | 94 (43.9)                 | 72 (43.9)                 | 22 (44.0)             | 1.000   | 0/214                |
| Invasive fungal infection        | 26 (12.1)                 | 18 (11.0)                 | 8 (16.0)              | 0.332   | 0/214                |
| Candidiasis                      | 19 (8.9)                  | 13 (7.9)                  | 6 (12.0)              |         | 0/214                |
| Aspergillosis                    | 5 (2.3)                   | 3 (1.8)                   | 2 (4.0)               | 0.490   | 0/214                |
| Other                            | 2 (0.9)                   | 2 (1.2)                   | 0 (0)                 |         | 0/214                |
| Overall mortality                | 29 (13.6)                 | 18 (11.0)                 | 11 (22.0)             | 0.059   | 0/214                |
| Time to death (days)             | 49 (1-341)                | 42 (1-330)                | 58 (15-341)           | 0.192   | 0/29                 |
| Graft failure                    | 17 (7.9)                  | 12 (7.3)                  | 5 (10.0)              | 0.554   | 0/214                |
| Time to onset (days)             | 52 (1-300)                | 59 (1-300)                | 9 (1-75)              | 0.154   | 0/17                 |
| Re-transplantation               | 9 (4.2)                   | 6 (3.7)                   | 3 (6.0)               | 0.439   | 0/214                |
| Immunological complications      | 23 (10.7)                 | 15 (9.1)                  | 8 (16.0)              | 0.201   | 9/214                |
| ACR, early-onset                 | 8 (3.7)                   | 3 (1.8)                   | 5 (10.0)              | 0.020   | 9/214                |
| ACR, late-onset                  | 12 (5.6)                  | 10 (6.0)                  | 2 (4.0)               | 0.736   | 13/214               |
| Chronic rejection                | 1 (0.5)                   | 1 (0.6)                   | 0 (0)                 | 1.000   | 13./214              |
| Antibody mediated rejection      | 1 (0.5)                   | 1 (0.6)                   | 0 (0)                 | 1.000   | 13/214               |
| Graft-versus-host disease        | 1 (0.5)                   | 0 (0)                     | 1 (2.0)               | 0.234   | 13/214               |
| Vascular complications           | 30 (14.0)                 | 23 (14.0)                 | 7 (14.0)              | 0.817   | 9/214                |
| HAT, early-onset                 | 8 (3.7)                   | 5 (3.0)                   | 3 (6.0)               | 0.400   | 9/214                |
| HAT, late-onset                  | 3 (1.4)                   | 3 (1.8)                   | 0 (0)                 | 1.000   | 9/214                |
| Portal vein thrombosis           | 10 (4.7)                  | 8 (4.9)                   | 2 (4.0)               | 1.000   | 9/214                |
| Venous thromboembolism           | 4 (1.9)                   | 4 (2.4)                   | 0 (0)                 | 0.574   | 9/214                |
| Arterial thrombotic disease      | 5 (2.3)                   | 3 (1.8)                   | 2 (4.0)               | 0.595   | 9/214                |
| Non-anastomic biliary strictures | 27 (12.6)                 | 18 (11.0)                 | 9 (18.0)              | 0.230   | 9/214                |
| Ischemic type biliary lesion     | 15 (7.0)                  | 8 (4.9)                   | 7 (14.0)              | 0.053   | 9./214               |
| Intraheptaic biliary lesions     | 12 (5.6)                  | 10 (6.0)                  | 2 (4.0)               | 0.735   | 9./214               |
| PTLD                             | 2 (0.9)                   | 0 (0)                     | 2 (4.0)               | 0.056   | 9/214                |

Abbreviations: CMV: cytomegalovirus; ACR: acute cellular rejection; HAT: hepatic artery thrombosis; VTE: venous thromboembolism; PTLD: post-transplant lymphoproliferative disorder.

**Table S6.** One-year outcome and indirect effects of CMV infection related to serostatus (n=214).

|                                    | <b>All<br/>(n = 214)</b> | <b>D+/R-<br/>(n = 59)</b> | <b>R+<br/>(n = 103)</b> | <b>D-/R-<br/>(n = 52)</b> | <b>P-value</b> | <b>Missing<br/>(n/Total)</b> |
|------------------------------------|--------------------------|---------------------------|-------------------------|---------------------------|----------------|------------------------------|
| Overall mortality                  | 29 (13.6)                | 4 (6.8)                   | 16 (15.5)               | 9 (17.3)                  | 0.206          | 0/214                        |
| Time of death (days)               | 49 (1-341)               | 145 (1-330)               | 49 (3-341)              | 44 (2-279)                | 0.570          | 0/29                         |
| Graft failure                      | 17 (7.9)                 | 2 (3.4)                   | 11 (10.7)               | 4 (7.7)                   | 0.290          | 0/214                        |
| Time of onset (days)               | 52 (1-300)               | 59 (56-62)                | 52 (1-300)              | 7 (1-120)                 | 0.482          | 0/17                         |
| Retransplantation                  | 9 (4.2)                  | 2 (3.4)                   | 5 (4.9)                 | 2 (3.8)                   | 0.913          | 0/214                        |
| Immunological complications        | 23 (10.7)                | 4 (6.8)                   | 16 (15.5)               | 3 (5.8)                   | 0.074          | 9/214                        |
| ACR, early-onset                   | 8 (3.7)                  | 1 (1.7)                   | 5 (4.9)                 | 2 (3.8)                   | 0.586          |                              |
| ACR, late-onset                    | 12 (5.6)                 | 3 (5.0)                   | 8 (7.8)                 | 1 (1.9)                   | 0.345          |                              |
| Chronic rejection                  | 1 (0.5)                  | 0 (0)                     | 1 (1.0)                 | 0 (0)                     | 1.000          |                              |
| Antibody mediated rejection        | 1 (0.5)                  | 0 (0)                     | 1 (1.0)                 | 0 (0)                     | 1.000          |                              |
| Graft-versus-host disease          | 1 (0.5)                  | 0 (0)                     | 1 (1.0)                 | 0 (0)                     | 1.000          |                              |
| Vascular complications             | 30 (14.0)                | 11 (18.6)                 | 12 (11.7)               | 7 (13.5)                  | 0.546          | 9/214                        |
| HAT, early-onset                   | 8 (3.7)                  | 2 (3.4)                   | 4 (3.9)                 | 2 (3.8)                   | 1.000          |                              |
| HAT, late-onset                    | 3 (1.4)                  | 2 (3.4)                   | 1 (1.0)                 | 0 (0)                     | 0.445          |                              |
| Portal vein thrombosis             | 10 (4.7)                 | 5 (8.5)                   | 2 (1.9)                 | 3 (5.8)                   | 0.157          |                              |
| Venous thromboembolism             | 4 (1.9)                  | 1 (1.7)                   | 2 (1.9)                 | 1 (1.9)                   | 1.000          |                              |
| Arterial thrombotic disease        | 5 (2.3)                  | 1 (1.7)                   | 3 (2.9)                 | 1 (1.9)                   | 1.000          |                              |
| Non-anastomotic biliary strictures | 27 (12.6)                | 9 (15.3)                  | 15 (14.6)               | 3 (5.8)                   | 0.218          | 9/214                        |
| Ischemic type biliary lesion       | 15 (7.0)                 | 3 (5.1)                   | 11 (10.7)               | 1 (1.9)                   | 0.099          |                              |
| Intrahepatic biliary lesions       | 12 (5.6)                 | 6 (10.2)                  | 4 (3.9)                 | 2 (3.8)                   | 0.251          |                              |
| PTLD                               | 2 (0.9)                  | 0 (0)                     | 2 (1.9)                 | 0 (0)                     | 0.499          | 9/214                        |

Abbreviations: CMV: cytomegalovirus; ACR: acute cellular rejection; HAT: hepatic artery thrombosis; PTLD: post-transplant lymphoproliferative disorder.



**Table S7.** One-year outcome and indirect effects of CMV infection related to virus load (IU/ml; *n*=50).

|                                    | <b>All<br/>(<i>n</i> = 50)</b> | <b>&gt;125-500<br/>(<i>n</i> =24)</b> | <b>501-1000<br/>(<i>n</i> = 7)</b> | <b>&gt;1000<br/>(<i>n</i> = 19)</b> | <b>P-value</b> | <b>Missing<br/>(<i>n</i>/Total)</b> |
|------------------------------------|--------------------------------|---------------------------------------|------------------------------------|-------------------------------------|----------------|-------------------------------------|
| Overall mortality                  | 11 (22.0)                      | 7 (29.2)                              | 1 (14.3)                           | 3 (15.8)                            | 0.481          | 0/50                                |
| Time of death (days)               | 57 (15-341)                    | 161 (29-341)                          | 15 (-)                             | 49 (40-220)                         | 0.250          |                                     |
| Graft failure                      | 5 (10.0)                       | 3 (12.5)                              | 2 (28.6)                           | 0 (0)                               | 0.096          | 0/50                                |
| Time of onset (days)               | 9 (1-75)                       | 52 (2-75)                             | 5 (1-9)                            | 0 (0)                               | 0.248          |                                     |
| Retransplantation                  | 3 (6.0)                        | 2 (8.3)                               | 1 (14.3)                           | 0 (0)                               | 0.376          |                                     |
| CMV relapse                        | 18 (36.0)                      | 8 (33.3)                              | 2 (28.6)                           | 8 (42.1)                            | 0.733          | 1/50                                |
| Immunological complications        | 8 (16.0)                       | 5 (20.8)                              | 1 (14.3)                           | 2 (10.5)                            | 0.676          | 1/50                                |
| ACR, early-onset                   | 5 (10.0)                       | 4 (16.7)                              | 0 (0)                              | 1 (5.3)                             | 0.367          |                                     |
| ACR, late-onset                    | 2 (4.0)                        | 0 (0)                                 | 1 (14.3)                           | 1 (5.3)                             | 0.167          |                                     |
| Chronic rejection                  | 0 (0)                          | 0 (0)                                 | 0 (0)                              | 0 (0)                               | -              |                                     |
| Antibody mediated rejection        | 0 (0)                          | 0 (0)                                 | 0 (0)                              | 0 (0)                               | -              |                                     |
| Graft-versus-host disease          | 1 (2.0)                        | 1 (4.2)                               | 0 (0)                              | 0 (0)                               | 1.000          |                                     |
| Vascular complications             | 7 (14.0)                       | 5 (20.8)                              | 2 (28.6)                           | 0 (0)                               | 0.051          | 0/50                                |
| HAT, early-onset                   | 3 (6.0)                        | 1 (4.2)                               | 2 (28.6)                           | 0 (0)                               | 0.065          |                                     |
| HAT, late-onset                    | 0 (0)                          | 0 (0)                                 | 0 (0)                              | 0 (0)                               | -              |                                     |
| Portal vein thrombosis             | 2 (4.0)                        | 2 (8.3)                               | 0 (0)                              | 0 (0)                               | 0.645          |                                     |
| Venous thromboembolism             | 0 (0)                          | 0 (0)                                 | 0 (0)                              | 0 (0)                               | -              |                                     |
| Arterial thrombotic disease        | 2 (4.0)                        | 2 (8.3)                               | 0 (0)                              | 0 (0)                               | 0.645          |                                     |
| Non-anastomotic biliary strictures | 9 (18.0)                       | 4 (16.7)                              | 1 (14.3)                           | 4 (21.1)                            | 1.000          | 0/50                                |
| Ischemic type biliary lesion       | 7 (14.0)                       | 3 (12.5)                              | 0 (0)                              | 4 (21.1)                            | 0.420          |                                     |
| Intrahepatic biliary lesions       | 2 (4.0)                        | 1 (4.2)                               | 1 (14.3)                           | 0 (0)                               | 0.448          |                                     |
| PTLD                               | 2 (4.0)                        | 2 (8.3)                               | 0 (0)                              | 0 (0)                               | 0.645          | 0/50                                |

Abbreviations: CMV: cytomegalovirus; ACR: acute cellular rejection; HAT: hepatic artery thrombosis; PTLD: post-transplant lymphoproliferative disorder.
